# Supplementary material
Source: Royal Society of Chemistry journal article supplement (doi:10.1039/d5ew01032b)
Supplement: d5ew01032b1.pdf [file d5ew01032b1.pdf]

## Supporting information

### Title: Kitchen waste compost leachate as compensatory carbon sources intensify nitrogen removal in sewage treatments

Table S1 Water quality of CL from 4 kitchen waste disposal sites in Hangzhou.

| Source of leachate | pH        | TN (mg/L)   | NH <sub>4</sub> <sup>+</sup> -N (mg/L) | COD (mg/L)  | Oil content (%) |
|--------------------|-----------|-------------|----------------------------------------|-------------|-----------------|
| Eshan              | 5.29      | 470.2       | 234.0                                  | 37894       | 0.39            |
| Tonglu             | 4.59      | 1174.5      | 503.0                                  | 21034       | 0.26            |
| Shangcheng 1# site | 5.43      | 771.0       | 362.0                                  | 42854       | 0.20            |
| Shangcheng 2# site | 5.34      | 430.6       | 238.0                                  | 22221       | 0.53            |
| Average            | 5.16±0.39 | 711.6±344.0 | 334.3±127.2                            | 31001±11022 | 0.35±0.15       |

Table S2 The water quality of effluent from each pool in Fuchun sewage plant.

| Sample               | COD (mg/L) | NH <sub>4</sub> <sup>+</sup> -N (mg/L) | NO <sub>3</sub> <sup>-</sup> -N (mg/L) | TN (mg/L) | TP (mg/L) | pH   | DO (mg/L) | Salinity (%) |
|----------------------|------------|----------------------------------------|----------------------------------------|-----------|-----------|------|-----------|--------------|
| Adjusting pool       | 112        | 12.65                                  | 0.02                                   | 20.6      | 0.32      | 7.04 | 4.9       | 0.02         |
| SBR pool             | 12         | 1.58                                   | 2.89                                   | 9.6       | 0.25      | 6.77 | 9.2       | 0.02         |
| Clarifier            | 64         | 0.66                                   | 2.63                                   | 11.2      | 0.16      | 6.49 | 8.6       | 0.02         |
| Denitrification pool | NA         | 1.26                                   | 0.1                                    | 10.3      | 0.15      | 6.45 | 9.3       | 0.02         |

Note: NA is below the detection limit

Table S3 The main physicochemical properties of CL and domestic sewage.

| Sample          | COD (mg/L) | NH <sub>4</sub> <sup>+</sup> -N (mg/L) | NO <sub>3</sub> <sup>-</sup> -N (mg/L) | TN (mg/L) | TP (mg/L) | pH   | DO (mg/L) | Salinity (%) | TS (g/L) | TDS (g/L) | TOC (mg/L) |
|-----------------|------------|----------------------------------------|----------------------------------------|-----------|-----------|------|-----------|--------------|----------|-----------|------------|
| CL              | 38225      | 134                                    | 148.6                                  | 765       | 0.47      | 5.20 | 1.05      | 0.26         | 41.65    | 28.2      | 10850      |
| Domestic sewage | 112        | 12.65                                  | 0.02                                   | 20.6      | 0.32      | 7.14 | 4.9       | 0.02         | 0.3      | 0.1       | 1.03       |

Table S4 The water quality of influent both raw and pre-treated CL addition into the actual sewage with varying proportions.

| Addition ratio | NH <sub>4</sub> <sup>+</sup> -N (mg/L) | NO <sub>3</sub> <sup>-</sup> -N (mg/L) | TN (mg/L) | COD (mg/L) | TP (mg/L) | pH*  |
|----------------|----------------------------------------|----------------------------------------|-----------|------------|-----------|------|
| 0.25%          | 12.93                                  | 0.39                                   | 22.9      | 145        | 0.321     | 6.92 |
| 0.50%          | 13.24                                  | 0.76                                   | 24.2      | 244        | 0.322     | 6.83 |
| 0.75%          | 13.7                                   | 1.38                                   | 26.9      | 339        | 0.323     | 6.74 |
| 1.00%          | 13.93                                  | 1.5                                    | 28.9      | 445        | 0.324     | 6.66 |
| 1.25%          | 14.27                                  | 1.86                                   | 30.2      | 547        | 0.326     | 6.57 |
| 1.50%          | 14.62                                  | 2.64                                   | 32.4      | 652        | 0.328     | 6.49 |
| 2.00%          | 15.42                                  | 3.48                                   | 35.8      | 810        | 0.331     | 6.35 |
| 2.50%          | 16.59                                  | 4.35                                   | 38.1      | 1169       | 0.336     | 6.27 |
| 3.00%          | 17.75                                  | 6.43                                   | 42.2      | 1220       | 0.344     | 6.12 |

\*pH values were measured immediately after mixing CL with domestic sewage (initial influent pH).

Table S5 Bacterial biomarkers identified by LEfSe analysis among CK, S1 and S2 groups, basing on the Kruskal–Wallis test with threshold LDA > 3.5 and  $p < 0.05$ .

| Level  | Name                                       | group | LDA  | $p$  |
|--------|--------------------------------------------|-------|------|------|
| Phylum | Firmicutes                                 | S2    | 4.74 | 0.03 |
| Phylum | Actinobacteriota                           | S2    | 4.61 | 0.03 |
| Phylum | Patescibacteria                            | CK    | 3.68 | 0.04 |
| Class  | Actinobacteria                             | S2    | 4.77 | 0.03 |
| Class  | Bacilli                                    | S2    | 4.77 | 0.03 |
| Class  | Acidimicrobiia                             | CK    | 4.08 | 0.04 |
| Class  | Thermoleophilia                            | CK    | 3.99 | 0.03 |
| Class  | JG30-KF-CM66                               | CK    | 3.65 | 0.04 |
| Class  | Phycisphaerae                              | CK    | 3.55 | 0.03 |
| Order  | Rhodobacterales                            | S1    | 3.92 | 0.03 |
| Order  | Actinomycetales                            | S2    | 4.12 | 0.03 |
| Order  | Lactobacillales                            | S2    | 4.75 | 0.03 |
| Order  | IMCC26256                                  | CK    | 3.71 | 0.04 |
| Order  | Microtrichales                             | CK    | 3.65 | 0.04 |
| Order  | Solirubrobacterales                        | CK    | 3.90 | 0.03 |
| Order  | norank_c_JG30-KF-CM66                      | CK    | 3.67 | 0.04 |
| Family | Rhodocyclaceae                             | S1    | 4.10 | 0.04 |
| Family | Rhodobacteraceae                           | S1    | 3.90 | 0.03 |
| Family | Actinomycetaceae                           | S2    | 4.13 | 0.03 |
| Family | Saccharimonadaceae                         | S2    | 3.53 | 0.03 |
| Family | Solirubrobacteraceae                       | CK    | 3.67 | 0.03 |
| Family | norank_o_IMCC26256                         | CK    | 3.80 | 0.04 |
| Family | 67-14                                      | CK    | 3.51 | 0.03 |
| Family | norank_o_JG30-KF-CM66                      | CK    | 3.59 | 0.04 |
| Genus  | <i>Micropruina</i>                         | S1    | 4.10 | 0.02 |
| Genus  | <i>unclassified_f_Rhodobacteraceae</i>     | S1    | 3.82 | 0.03 |
| Genus  | <i>unclassified_f_Rhodocyclaceae</i>       | S1    | 3.66 | 0.04 |
| Genus  | <i>Propioniciclava</i>                     | S2    | 4.20 | 0.04 |
| Genus  | <i>TM7a</i>                                | S2    | 3.55 | 0.03 |
| Genus  | <i>norank_f_Actinomycetaceae</i>           | S2    | 4.11 | 0.03 |
| Genus  | <i>unclassified_f_Solirubrobacteraceae</i> | CK    | 3.50 | 0.03 |
| Genus  | <i>norank_f_Steroidobacteraceae</i>        | CK    | 3.66 | 0.04 |
| Genus  | <i>norank_f_IMCC26256</i>                  | CK    | 3.76 | 0.04 |
| Genus  | <i>norank_f_JG30-KF-CM66</i>               | CK    | 3.65 | 0.04 |

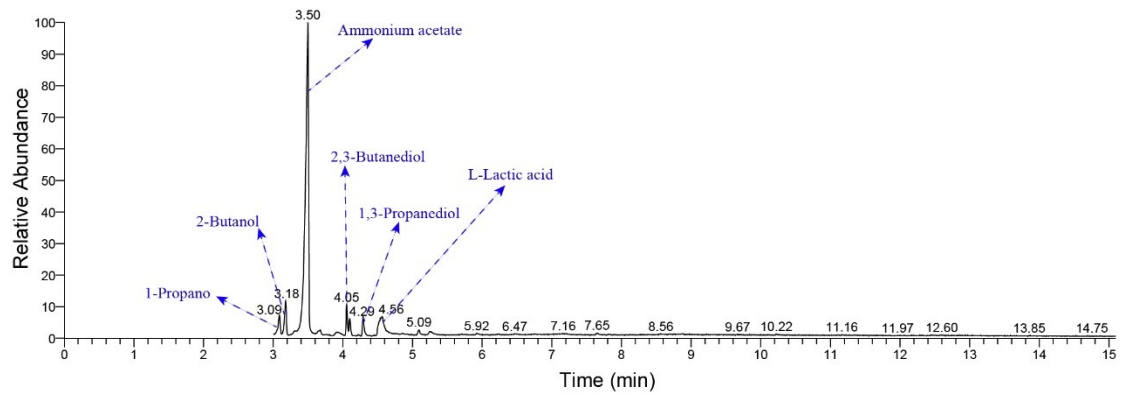

Figure S1 Components of organic carbon in CL, determined by Gas Chromatography and Mass Spectrometry (GC-MS, TRACE1300-ISQ7000, Thermo Fisher Scientific).

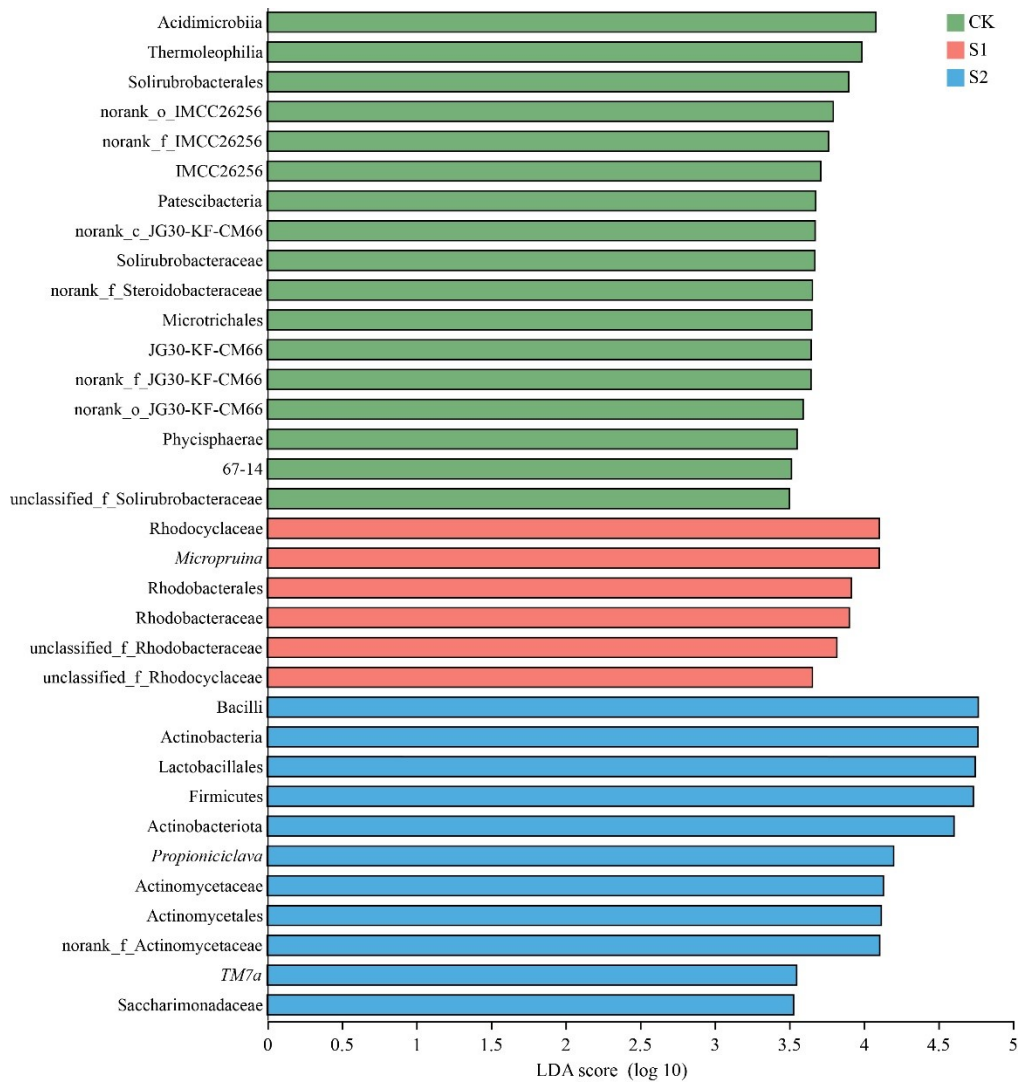

Figure S2 LDA score identified the size of sludge among CK, S1 and S2 groups, basing on the Kruskal–Wallis test with threshold LDA > 3.5 and  $p < 0.05$ .

a) M00530

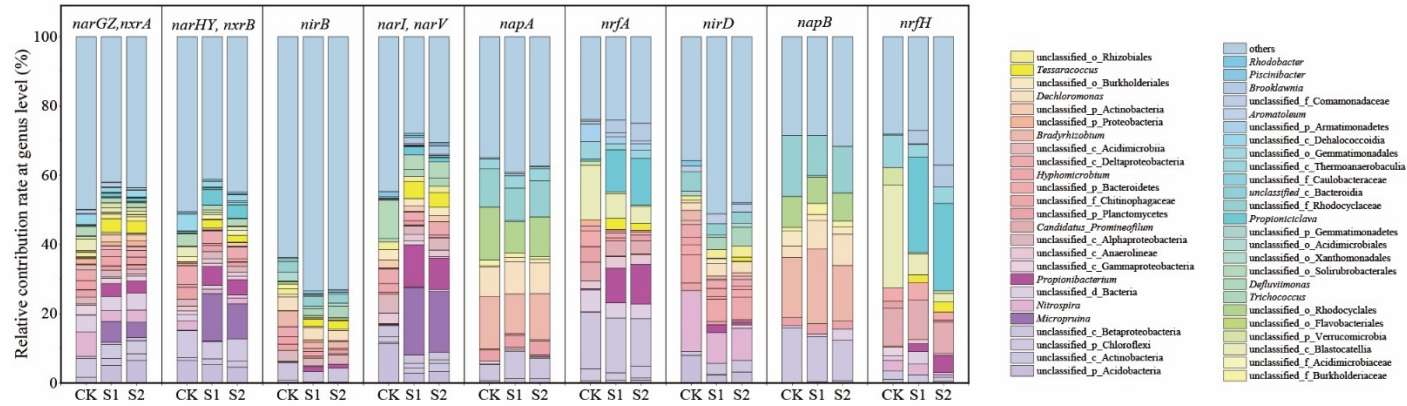

b) M00528

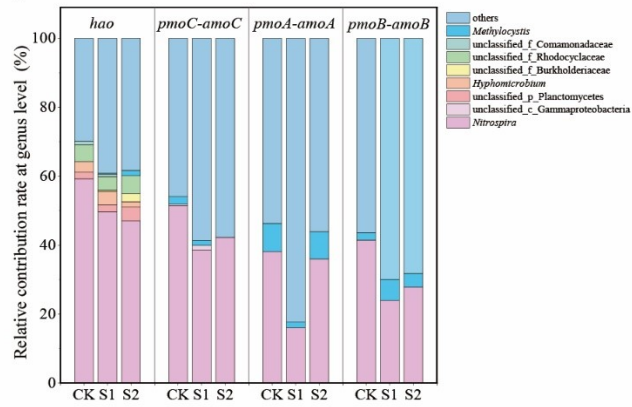

c) M00175

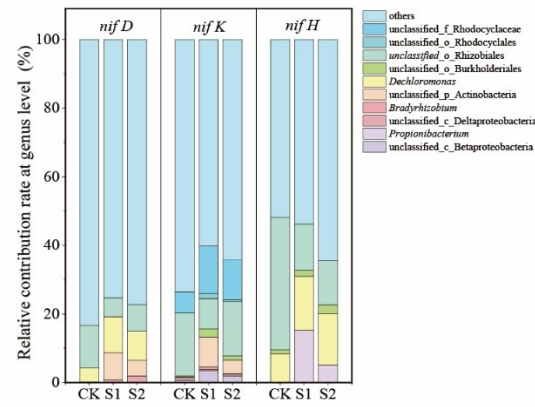

d) M00531

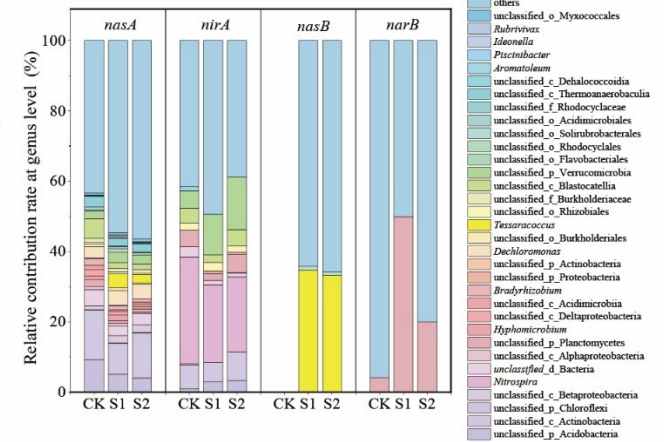

Figure S3 Relative contribution of microbes to N-metabolic pathways of different sludge groups. Panel (a)-(d) were the main functional bacteria relative contribution to nitrogen pathways, including DNRA (M00530), nitrification (M00528), nitrogen fixation (M00175) and assimilatory nitrate reduction (M00531) modules.
